# Supplementary material for: In situ light-assisted preparation of MoS2 on graphitic C3N4 nanosheets for enhanced photocatalytic H2 production from water
Source: Royal Society of Chemistry journal article supplement (doi:10.1039/c5ta00402k), 2015-01-01
Supplement: c5ta00402k1.pdf [file c5ta00402k1.pdf]

## Electronic Supplementary Information

### **In situ light-assisted preparation of MoS<sub>2</sub> on graphitic C<sub>3</sub>N<sub>4</sub> nanosheet for enhanced photocatalytic H<sub>2</sub> production from water**

Hui Zhao, Yuming Dong\*, Pingping Jiang\*, Hongyan Miao, Guangli Wang, Jingjing Zhang

Key Laboratory of Food Colloids and Biotechnology (Ministry of Education of China), School of Chemical and Material Engineering, Jiangnan University, Wuxi 214122, P. R. China

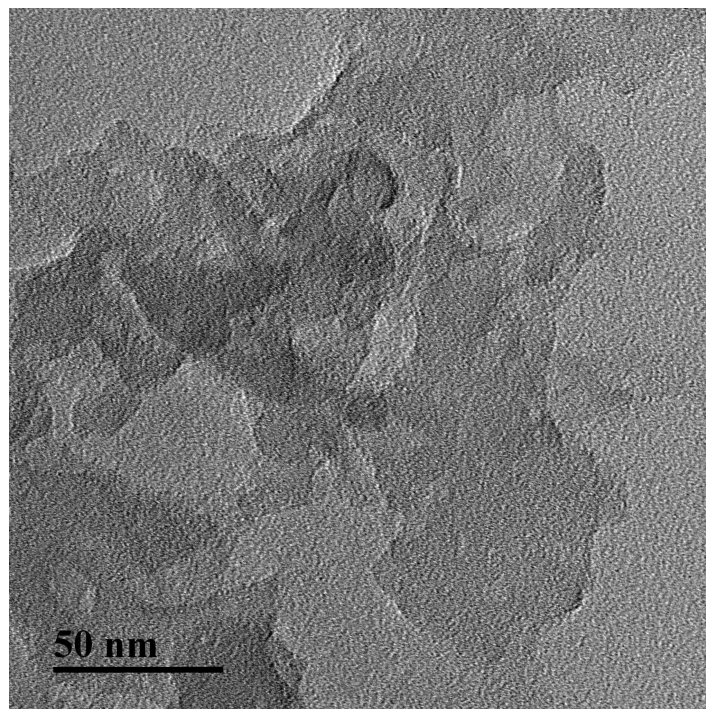

Fig. S1 TEM image of g-C<sub>3</sub>N<sub>4</sub> nanosheets

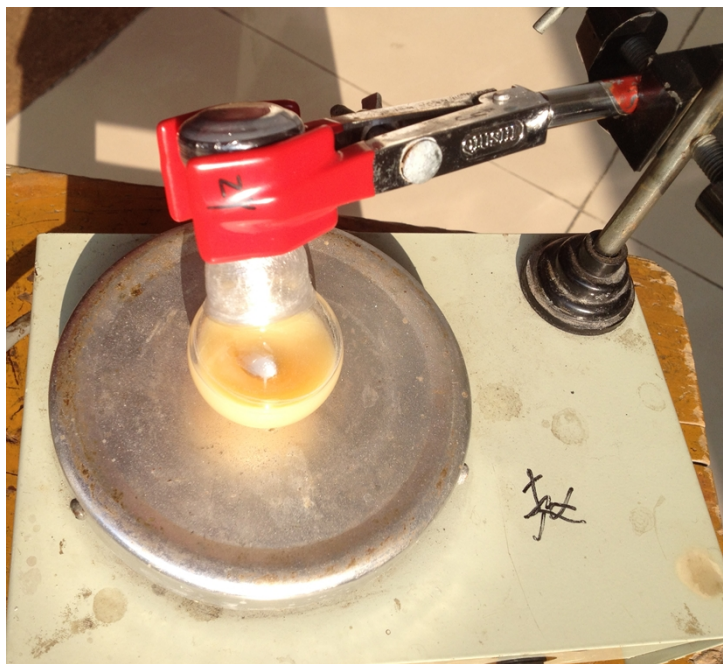

Fig. S2 The photo of outdoor equipment of sunlight-driven water splitting by  $\text{g-C}_3\text{N}_4/\text{MoS}_2$ -2.89% system in Wuxi city on Nov. 18 2014. Outdoor temperature: 9-14 °C, Time: 09:00-15:00.
